# Supplementary material
Source: PubMed Central journal article supplement (PMC3033591)
Supplement: neo1302_0120SD1.pdf [file neo1302_0120SD1.pdf]

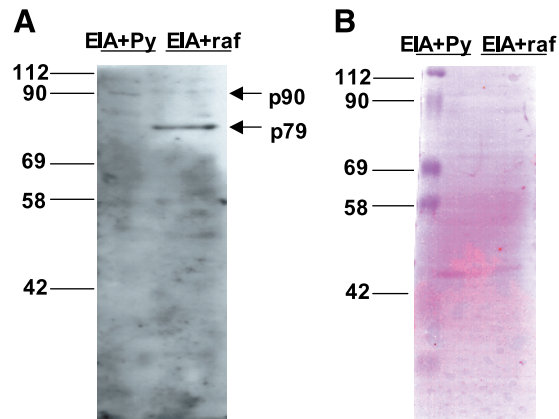

**Figure W1.** EIA + raf cells express a high level of p79 gag-raf polyprotein. PC EIA + Py and PC EIA + raf cells, grown in normal conditions (5% calf serum), were harvested, and whole-cell lysates were immunoblotted with anti-C-Raf antibodies (A). For control of loading, the filter was stained with Ponceau S (B).

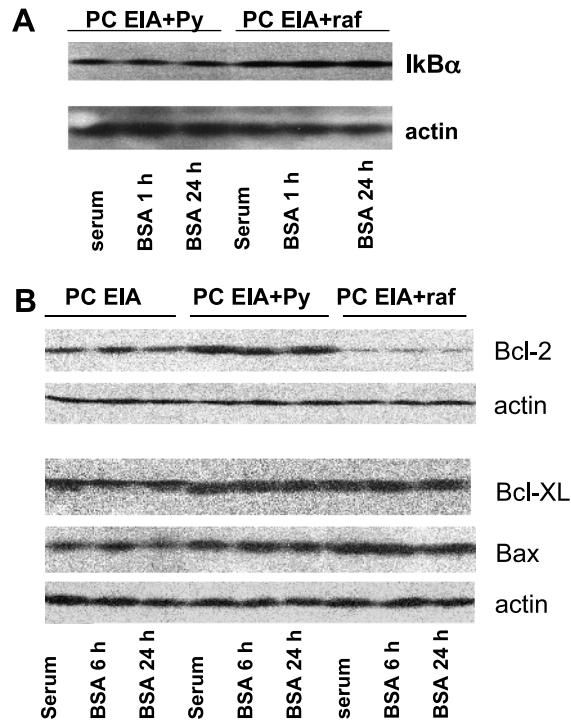

**Figure W2.** NF- $\kappa$ B is not activated in EIA + raf and EIA + Py cells after growth factor deprivation. EIA + raf cells show lower levels of Bcl2 and equal levels of Bcl-XL and Bax with respect to EIA + Py cells. Cells were kept in the presence of serum or deprived of serum in the presence of 0.2% BSA for 48 hours. At the end of this period in the serum-starved medium, cells were harvested. Whole-cell lysates were prepared and immunoblotted using anti-Ik $\beta$ , anti-Bcl2, anti-Bcl-XL, and anti-Bax antibodies as outlined in Materials and Methods.

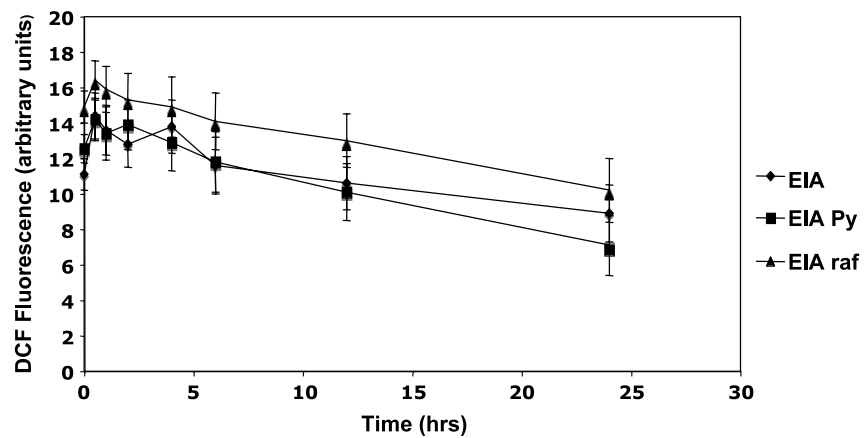

**Figure W3.** Estimation of intracellular ROS level. Cells were kept in the presence of serum or deprived of serum in the presence of 0.2% BSA for various periods. Floating and adherent cells were collected by mild trypsinization, washed in PBS, and resuspended in PBS, 10  $\mu$ M 5,6-carboxy-2',7'-dichlorofluorescein diacetate (DCFH-DA; Molecular Probes, Inc, Eugene, OR), 5  $\mu$ g/ml propidium iodide at 37°C, and kept in DCFH-DA thereafter. DCFH-DA is a compound taken up by the cells and trapped in a nonfluorescent deacylated form (DCFH). DCFH is oxidized by ROS to a fluorescent form. After 1 hour of incubation, cells were analyzed by FACScan with excitation at 495-nm and emission at 525-nm wavelengths. Nonintact cells leak DCFH but were stained by propidium iodide and excluded. The results shown are means  $\pm$  SD of at least three different experiments.

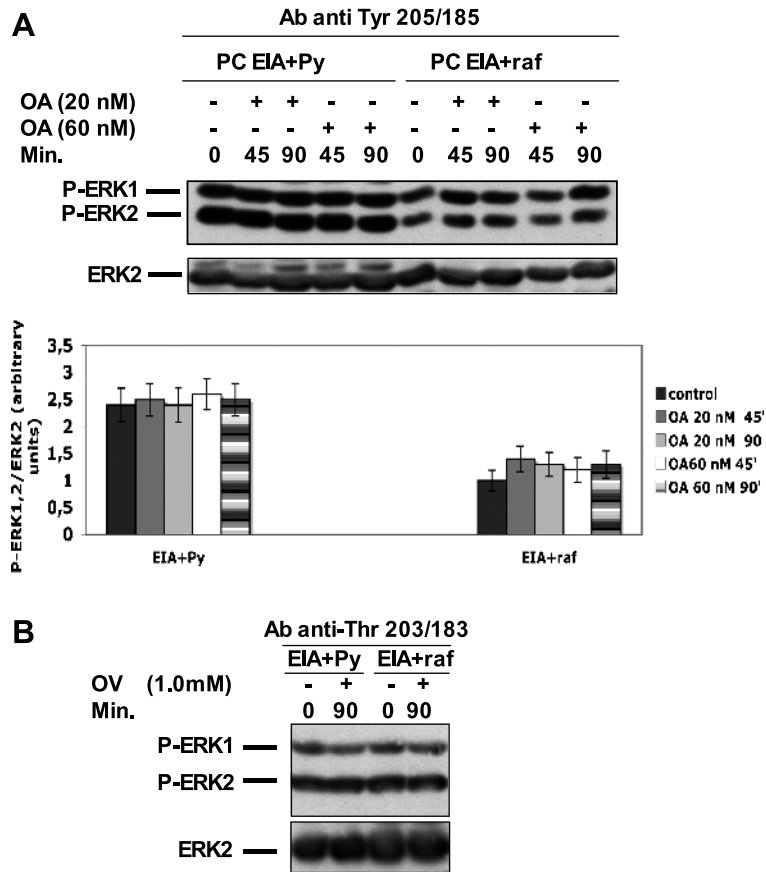

**Figure W4.** OA treatment does not increase Tyr 205/185 phosphorylation, and OV treatment does not increase Thr 203/183 phosphorylation neither in EIA + raf nor in EIA+Py cells. EIA + raf and EIA+Py cells were treated with OA (A) or OV (B) for the indicated concentrations and times. Whole cell lysates were prepared and immunoblotted using anti-P-ERK1/2 (anti-P-Tyr 205/185 antibodies, able to detect P-Tyr 205/185 irrespective of the state of Thr 203/183) (A) and anti-P-ERK1/2 (anti-Thr 203/183 antibodies, able to detect P-Thr 203/183 irrespective of the state of Tyr 205/185) (B), and anti-ERK2 antibodies, as outlined in Materials and Methods. In (A), the results shown are means  $\pm$  SD of three independent experiments. In (B), a representative experiment of three independent experiments is shown.

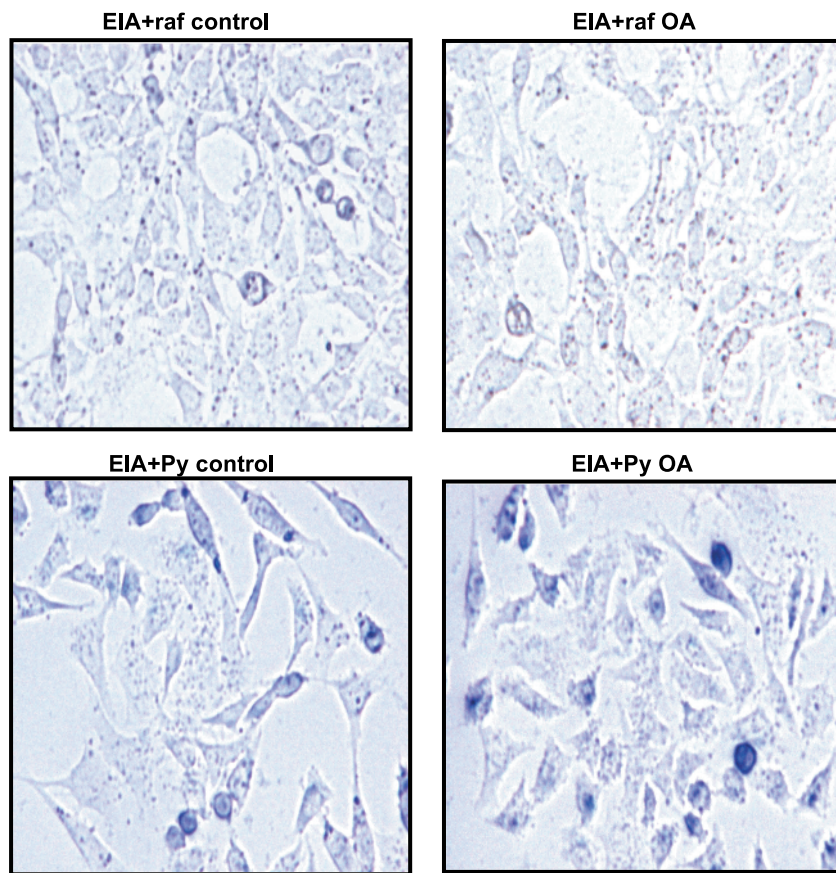

**Figure W5.** OA treatment does not cause the appearance of the hallmarks of senescence in both EIA + raf and EIA + Py cells. Transformed PC EIA + raf and PC EIA+Py cells were mock-treated or treated with 60 nM OA for 90 minutes and then incubated with regular medium (without OA) for 48 hours. Control and OA-treated cells were subjected to  $\beta$ -galactosidase staining at the end of the 48-hour period in the regular medium without OA.

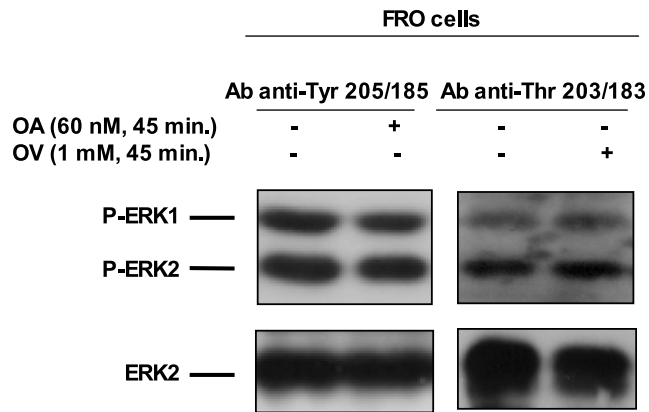

**Figure W6.** OA treatment does not increase Tyr 205/185 phosphorylation, and OV treatment does not increase Thr 203/183 phosphorylation in FRO anaplastic thyroid cancer cells. FRO cells were treated with OA or OV for the indicated concentrations and times. Whole-cell lysates were prepared and immunoblotted using anti-P-ERK1/2 (anti-P-Tyr 205/185 antibodies, able to detect P-Tyr 205/185 irrespective of the state of Thr 203/183) and anti-P-ERK1/2 (anti-Thr 203/183 antibodies, able to detect P-Thr 203/183 irrespective of the state of Tyr 205/185) and anti-ERK2 antibodies, as outlined in Materials and Methods. A representative experiment of three independent experiments is shown.
